# Supplementary material for: Abundance of impacted forest patches less than 5 km2 is a key driver of the incidence of malaria in Amazonian Brazil
Source: PubMed Central journal article supplement (PMC5935754; doi:10.1038/s41598-018-25344-5), 2018-05-04
Supplement: 41598_2018_25344_MOESM1_ESM.pdf [file 41598_2018_25344_MOESM1_ESM.pdf]

# Abundance of impacted forest patches less than 5 km<sup>2</sup> is a key driver of the incidence of malaria in Amazonian Brazil

Leonardo Suveges Moreira Chaves · Jan E Conn · Rossana Verónica Mendoza López · Maria Anice Mureb Sallum

## Supplementary Information

### Definitions used in text

- **Frontier malaria** - malaria associated with anthropogenic activities that include deforestation, a process that involves ecological phenomena, acting at multiple scales, together with human behavioral and economic conditions.
- **Deforestation** - a human-induced process whereby the rate of clearcutting forest over time, where the forest will regenerate itself, is associated with the changes in land use and land occupation by humans often follows.
- **Degraded forest** - a natural forest that has been altered at any level by human activities; change that negatively affects the structure or function of forest ecosystem components, the degree of human disturbance and openness of the forest canopy for logging.
- **Impacted forest** - the sum of the deforested and forest degraded areas detected by the Imazon<sup>®</sup> system.
- **Selective logging** - logging exploitation of a few commercial trees species, leaving most of the forest in place; however, forests become very degraded during these operations.
- **Ecosystem services** - the benefits people obtain from ecosystems, currently categorized into four types: provisioning, regulating, cultural, and supporting services.

Supplementary Table S1. Total number of malaria cases; total deforested, degraded and impacted areas; and total number of patches modified in Brazilian Amazonian states between 2009-2015.

| <b>Year</b>  | <b>No. of malaria cases</b> | <b>Deforestation (km<sup>2</sup>)</b> | <b>Degradation (km<sup>2</sup>)</b> | <b>Impacted forest (km<sup>2</sup>)</b> | <b>Number of impacted patches</b> |
|--------------|-----------------------------|---------------------------------------|-------------------------------------|-----------------------------------------|-----------------------------------|
| 2009         | 304,823                     | 1,893                                 | 2,115                               | 4,008                                   | 6,577                             |
| 2010         | 327,142                     | 1,490                                 | 4,315                               | 5,805                                   | 7,372                             |
| 2011         | 261,667                     | 1,462                                 | 4,494                               | 5,956                                   | 6,101                             |
| 2012         | 234,967                     | 1,768                                 | 1,557                               | 3,325                                   | 2,767                             |
| 2013         | 170,588                     | 1,144                                 | 738                                 | 1,882                                   | 2,023                             |
| 2014         | 139,935                     | 2,993                                 | 2,132                               | 5,125                                   | 5,614                             |
| 2015         | 138,697                     | 3,098                                 | 3,498                               | 6,596                                   | 6,235                             |
| <b>Total</b> | <b>1,577,819</b>            | <b>13,847</b>                         | <b>18,850</b>                       | <b>32,698</b>                           | <b>36,689</b>                     |

Supplementary Table S3. Annual percentage corresponding to the number of impacted patches than 15 km<sup>2</sup>, 5 km<sup>2</sup>, 0.5 km<sup>2</sup> and 0.25 km<sup>2</sup> for each month.

| <b>Months</b>  | <b>Impacted patches</b> | <b>2009</b> | <b>2010</b> | <b>2011</b> | <b>2012</b> | <b>2013</b> | <b>2014</b> | <b>2015</b> |
|----------------|-------------------------|-------------|-------------|-------------|-------------|-------------|-------------|-------------|
| <b>January</b> | < 15 km <sup>2</sup>    | 99%         | 100%        | 99%         | 100%        | 99%         | 99%         | 99%         |
|                | < 5 km <sup>2</sup>     | 96%         | 100%        | 96%         | 98%         | 95%         | 98%         | 95%         |
|                | < 0.5 km <sup>2</sup>   | 45%         | 86%         | 67%         | 70%         | 64%         | 70%         | 51%         |
|                | < 0.25 km <sup>2</sup>  | 23%         | 64%         | 41%         | 37%         | 39%         | 36%         | 22%         |

|                 |                        |      |      |      |      |      |      |      |
|-----------------|------------------------|------|------|------|------|------|------|------|
| <b>February</b> | < 15 km <sup>2</sup>   | 100% | 100% | 100% | 100% | 100% | 100% | 100% |
|                 | < 5 km <sup>2</sup>    | 99%  | 98%  | 100% | 100% | 87%  | 100% | 96%  |
|                 | < 0.5 km <sup>2</sup>  | 62%  | 65%  | 73%  | 51%  | 22%  | 95%  | 60%  |
|                 | < 0.25 km <sup>2</sup> | 34%  | 36%  | 41%  | 23%  | 9%   | 60%  | 32%  |
| <b>March</b>    | < 15 km <sup>2</sup>   | 100% | 99%  | 95%  | 98%  | 97%  | 95%  | 99%  |
|                 | < 5 km <sup>2</sup>    | 100% | 99%  | 95%  | 98%  | 97%  | 95%  | 99%  |
|                 | < 0.5 km <sup>2</sup>  | 85%  | 66%  | 64%  | 52%  | 58%  | 64%  | 49%  |
|                 | < 0.25 km <sup>2</sup> | 60%  | 32%  | 33%  | 24%  | 30%  | 14%  | 20%  |
| <b>April</b>    | < 15 km <sup>2</sup>   | 100% | 100% | 97%  | 98%  | 100% | 97%  | 99%  |
|                 | < 5 km <sup>2</sup>    | 97%  | 100% | 92%  | 93%  | 97%  | 87%  | 99%  |
|                 | < 0.5 km <sup>2</sup>  | 58%  | 72%  | 52%  | 36%  | 68%  | 18%  | 36%  |
|                 | < 0.25 km <sup>2</sup> | 37%  | 30%  | 28%  | 9%   | 39%  | 5%   | 12%  |
| <b>May</b>      | < 15 km <sup>2</sup>   | 100% | 100% | 100% | 96%  | 100% | 100% | 100% |
|                 | < 5 km <sup>2</sup>    | 98%  | 100% | 98%  | 85%  | 98%  | 95%  | 99%  |
|                 | < 0.5 km <sup>2</sup>  | 55%  | 64%  | 68%  | 27%  | 47%  | 50%  | 44%  |
|                 | < 0.25 km <sup>2</sup> | 33%  | 22%  | 36%  | 9%   | 20%  | 20%  | 14%  |
| <b>June</b>     | < 15 km <sup>2</sup>   | 99%  | 100% | 100% | 100% | 100% | 100% | 100% |
|                 | < 5 km <sup>2</sup>    | 95%  | 98%  | 99%  | 100% | 96%  | 98%  | 99%  |
|                 | < 0.5 km <sup>2</sup>  | 45%  | 60%  | 76%  | 44%  | 43%  | 52%  | 54%  |
|                 | < 0.25 km <sup>2</sup> | 24%  | 23%  | 39%  | 10%  | 16%  | 20%  | 17%  |
| <b>July</b>     | < 15 km <sup>2</sup>   | 100% | 100% | 100% | 100% | 100% | 100% | 100% |
|                 | < 5 km <sup>2</sup>    | 99%  | 99%  | 100% | 98%  | 97%  | 99%  | 99%  |
|                 | < 0.5 km <sup>2</sup>  | 68%  | 82%  | 79%  | 64%  | 58%  | 73%  | 68%  |
|                 | < 0.25 km <sup>2</sup> | 43%  | 49%  | 45%  | 42%  | 26%  | 36%  | 29%  |
| <b>August</b>   | < 15 km <sup>2</sup>   | 100% | 99%  | 100% | 100% | 100% | 99%  | 100% |
|                 | < 5 km <sup>2</sup>    | 100% | 97%  | 100% | 98%  | 95%  | 98%  | 99%  |
|                 | < 0.5 km <sup>2</sup>  | 89%  | 68%  | 85%  | 37%  | 61%  | 62%  | 70%  |
|                 | < 0.25 km <sup>2</sup> | 57%  | 41%  | 50%  | 12%  | 25%  | 28%  | 41%  |

|                  |                        |      |      |      |      |      |      |     |
|------------------|------------------------|------|------|------|------|------|------|-----|
| <b>September</b> | < 15 km <sup>2</sup>   | 100% | 99%  | 99%  | 99%  | 100% | 99%  | 98% |
|                  | < 5 km <sup>2</sup>    | 99%  | 96%  | 95%  | 95%  | 100% | 97%  | 94% |
|                  | < 0.5 km <sup>2</sup>  | 85%  | 72%  | 65%  | 56%  | 57%  | 63%  | 58% |
|                  | < 0.25 km <sup>2</sup> | 57%  | 44%  | 34%  | 33%  | 15%  | 27%  | 28% |
| <b>October</b>   | < 15 km <sup>2</sup>   | 100% | 100% | 98%  | 99%  | 100% | 99%  | 99% |
|                  | < 5 km <sup>2</sup>    | 100% | 99%  | 95%  | 97%  | 97%  | 96%  | 94% |
|                  | < 0.5 km <sup>2</sup>  | 82%  | 66%  | 63%  | 44%  | 72%  | 58%  | 61% |
|                  | < 0.25 km <sup>2</sup> | 48%  | 40%  | 35%  | 16%  | 26%  | 23%  | 37% |
| <b>November</b>  | < 15 km <sup>2</sup>   | 100% | 100% | 100% | 100% | 100% | 100% | 99% |
|                  | < 5 km <sup>2</sup>    | 100% | 97%  | 96%  | 99%  | 100% | 99%  | 97% |
|                  | < 0.5 km <sup>2</sup>  | 84%  | 60%  | 53%  | 65%  | 75%  | 77%  | 71% |
|                  | < 0.25 km <sup>2</sup> | 47%  | 35%  | 23%  | 36%  | 48%  | 41%  | 46% |
| <b>December</b>  | < 15 km <sup>2</sup>   | 100% | 100% | 99%  | 98%  | 100% | 99%  | 97% |
|                  | < 5 km <sup>2</sup>    | 100% | 98%  | 96%  | 86%  | 98%  | 95%  | 93% |
|                  | < 0.5 km <sup>2</sup>  | 77%  | 67%  | 48%  | 37%  | 80%  | 64%  | 39% |
|                  | < 0.25 km <sup>2</sup> | 59%  | 38%  | 19%  | 20%  | 49%  | 37%  | 9%  |

Supplementary Table S4. Monthly averages of variables database analyzed between 2009 - 2015 in Brazilian Amazonian States.

**Averages of variables database between 2009 and 2015**

| Month | No. of malaria cases | Deforestation (km <sup>2</sup> ) | Degradation (km <sup>2</sup> ) | Impact (km <sup>2</sup> ) | Accumulated rainfall (mm <sup>3</sup> ) | No. of patches (5.00 - 180.00 km <sup>2</sup> ) | No. of patches (0.05 - 5.00 km <sup>2</sup> ) | No. of patches (0.05 - 0.50 km <sup>2</sup> ) | No. of patches (0.05 - 0.25 km <sup>2</sup> ) | No. of patches (0.05 - 0.10 km <sup>2</sup> ) | No. of patches (0.05 - 0.08 km <sup>2</sup> ) |
|-------|----------------------|----------------------------------|--------------------------------|---------------------------|-----------------------------------------|-------------------------------------------------|-----------------------------------------------|-----------------------------------------------|-----------------------------------------------|-----------------------------------------------|-----------------------------------------------|
| JAN   | 18,497.7             | 83.3                             | 71.4                           | 154.6                     | 297.8                                   | 8.3                                             | 241.0                                         | 161.4                                         | 93.3                                          | 13.6                                          | 8.6                                           |
| FEB   | 16,508.0             | 53.2                             | 48.8                           | 102                       | 314.8                                   | 2.9                                             | 170.9                                         | 108.4                                         | 58.1                                          | 3.1                                           | 2.4                                           |

|     |              |       |       |       |       |      |       |       |       |      |     |
|-----|--------------|-------|-------|-------|-------|------|-------|-------|-------|------|-----|
| MAR | 16,368.<br>9 | 50.2  | 52    | 102.3 | 314.5 | 3.7  | 170.6 | 115.4 | 62.7  | 5.7  | 2.1 |
| APR | 16,220.<br>0 | 108.1 | 118.8 | 227   | 243.2 | 16.9 | 292.7 | 166.1 | 89.7  | 9.6  | 5.9 |
| MAY | 19,286.<br>9 | 134.7 | 78.6  | 213.3 | 183.7 | 8.6  | 304.4 | 172.1 | 80.0  | 5.4  | 2.3 |
| JUN | 21,165.<br>0 | 234.9 | 137.5 | 372.4 | 100.2 | 11.6 | 524.6 | 293.6 | 121.3 | 5.0  | 1.4 |
| JUL | 23,507.<br>9 | 257.5 | 132.4 | 390.0 | 79.3  | 8.0  | 734.4 | 526.0 | 287.3 | 27.1 | 9.7 |
| AUG | 22,030.<br>7 | 265.0 | 153.7 | 418.7 | 65.9  | 13.7 | 861.7 | 627.3 | 359.6 | 13.6 | 3.7 |
| SEP | 19,975.<br>4 | 215.0 | 137.7 | 352.7 | 69.5  | 22.1 | 646.1 | 453.9 | 249.0 | 20.7 | 7.0 |

|     |              |       |       |       |       |      |       |       |       |     |     |
|-----|--------------|-------|-------|-------|-------|------|-------|-------|-------|-----|-----|
| OCT | 18,537.<br>4 | 193.8 | 182.8 | 376.6 | 131.7 | 19.3 | 618.4 | 407.6 | 220.3 | 8.4 | 3.7 |
| NOV | 18,045.<br>9 | 76.8  | 62.8  | 139.6 | 170.3 | 4.6  | 276.0 | 202.6 | 117.4 | 6.1 | 2.9 |
| DEZ | 15,259.<br>0 | 83.5  | 92.6  | 176.1 | 218.2 | 10.4 | 270.4 | 171.1 | 93.4  | 5.3 | 2.1 |

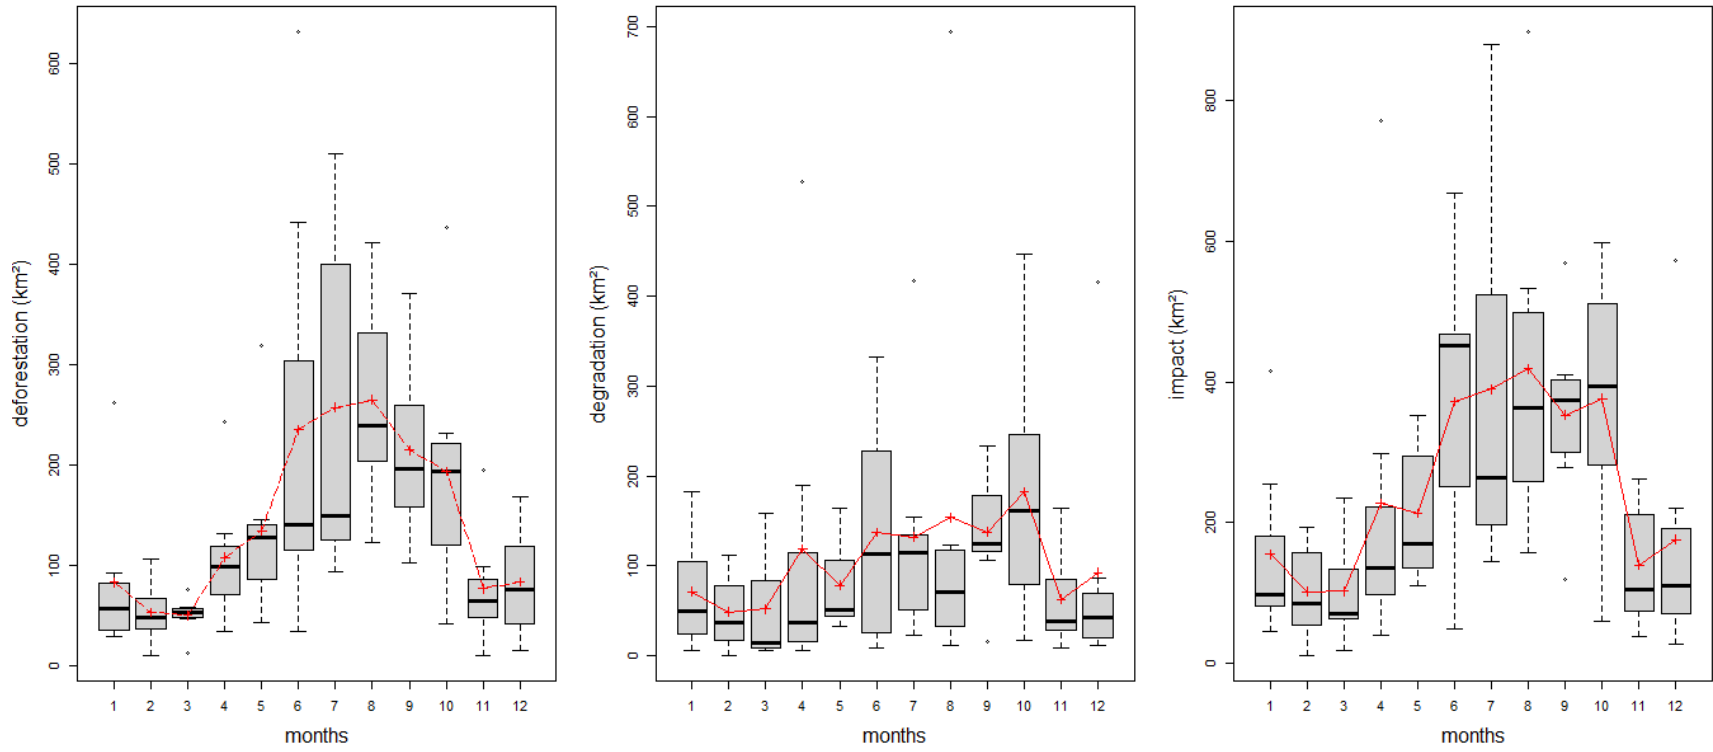

Supplementary Figure S1. Boxplot graphs of the data on deforestation, degradation and forestry impact between 2009 - 2015.



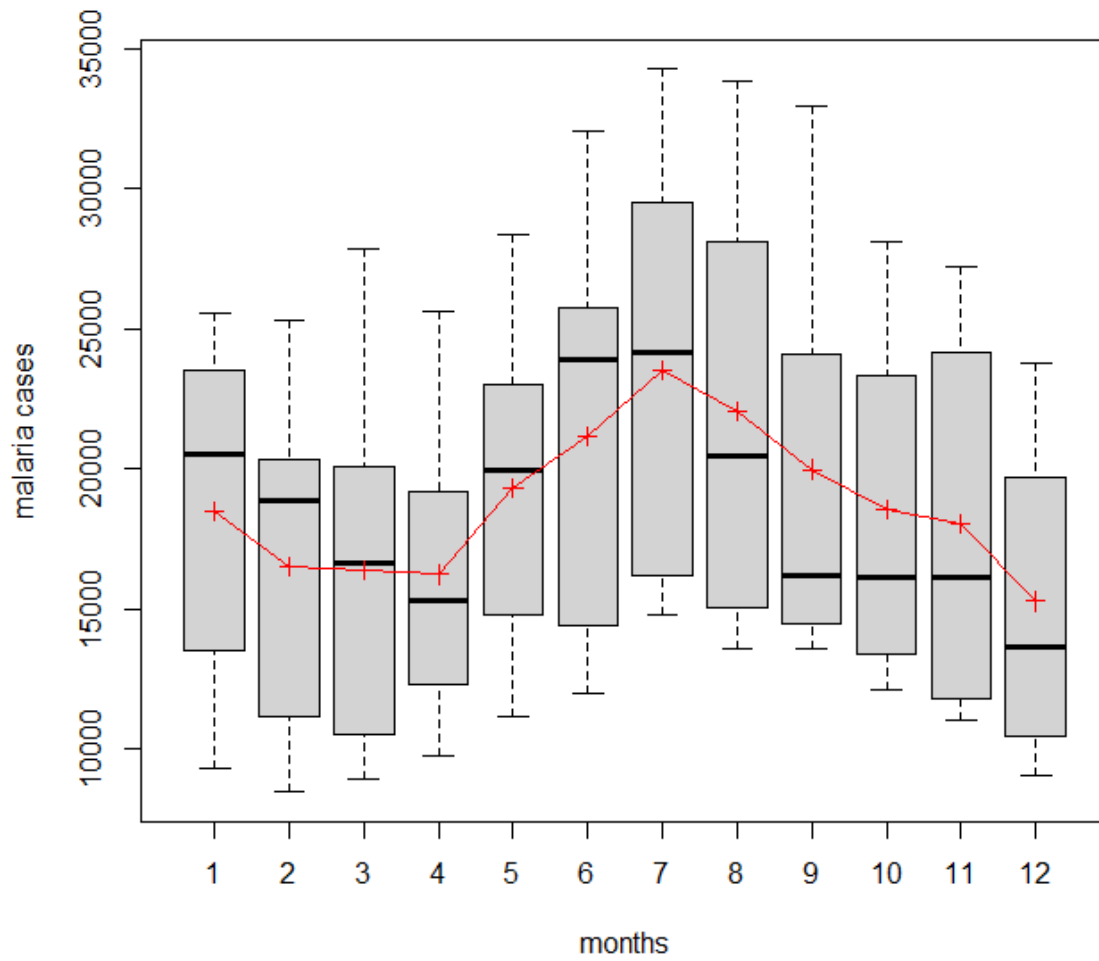

Supplementary Figure S2. Boxplot graphs of the monthly data on number of malaria cases between 2009 and 2015.
