# Supplementary material for: Abundance of impacted forest patches less than 5 km2 is a key driver of the incidence of malaria in Amazonian Brazil
Source: PubMed Central journal article supplement (PMC5935754; doi:10.1038/s41598-018-25344-5), 2018-05-04
Supplement: 41598_2018_25344_MOESM2_ESM.pdf [file 41598_2018_25344_MOESM2_ESM.pdf]

## Abundance of impacted forest patches less than 5 km<sup>2</sup> is a key driver of the incidence of malaria in Amazonian Brazil

Leonardo Suveges Moreira Chaves · Jan E Conn · Rossana Verónica Mendoza López · Maria Anice Mureb Sallum

### Supplementary Information

Supplementary Table S2. Principal municipalities with malaria cases in Brazilian Amazonia: total number of cases, annual averages, their share in the number of cases of their respective State, managerial centers of the territory and network of geopolitical and social influence.

| States /<br>Municipalities | Malaria cases |        |        |            |            |            |            |        | Annual<br>average<br>(Malaria cases) | Share of the Municipalities in the States (%) |           |           |           |           |           | Managerial<br>centers of<br>the<br>territory <sup>1</sup> | Municipalities<br>of<br>geopolitical<br>and social<br>influence |  |
|----------------------------|---------------|--------|--------|------------|------------|------------|------------|--------|--------------------------------------|-----------------------------------------------|-----------|-----------|-----------|-----------|-----------|-----------------------------------------------------------|-----------------------------------------------------------------|--|
|                            | 2009          | 2010   | 2011   | 2012       | 2013       | 2014       | 2015       | 2009   |                                      | 2010                                          | 2011      | 2012      | 2013      | 2014      | 2015      |                                                           |                                                                 |  |
| ACRE                       | 25.76<br>2    | 35.783 | 21.958 | 27.33<br>0 | 33.65<br>8 | 30.75<br>7 | 26.59<br>5 | 28.835 |                                      |                                               |           |           |           |           |           |                                                           |                                                                 |  |
| Cruzeiro do<br>Sul         | 15.16<br>1    | 21.790 | 12.689 | 15.99<br>3 | 19.60<br>2 | 17.18<br>6 | 14.62<br>9 | 16.721 | 58.8<br>5                            | 60.8<br>9                                     | 57.7<br>9 | 58.5<br>2 | 58.2<br>4 | 55.8<br>8 | 55.0<br>1 | Sub-<br>regional<br>center B<br>(3b)                      | Manaus,<br>Porto Velho,<br>Mâncio Lima,<br>Rodrigues<br>Alves   |  |
| Mâncio Lima                | 5.010         | 5.722  | 4.850  | 5.271      | 7.393      | 6.285      | 5.570      | 5.729  | 19.4<br>5                            | 15.9<br>9                                     | 22.0<br>9 | 19.2<br>9 | 21.9<br>7 | 20.4<br>3 | 20.9<br>4 | Local<br>Center (5)                                       | Cruzeiro do<br>Sul                                              |  |

| States /<br>Municipalities | Malaria cases |        |        |        |        |        |        | Annual<br>average<br>(Malaria cases) | Share of the Municipalities in the States (%) |       |       |       |       |       |       | Managerial<br>centers of<br>the<br>territory <sup>1</sup> | Municipalities<br>of<br>geopolitical<br>and social<br>influence                                                    |
|----------------------------|---------------|--------|--------|--------|--------|--------|--------|--------------------------------------|-----------------------------------------------|-------|-------|-------|-------|-------|-------|-----------------------------------------------------------|--------------------------------------------------------------------------------------------------------------------|
|                            | 2009          | 2010   | 2011   | 2012   | 2013   | 2014   | 2015   |                                      | 2009                                          | 2010  | 2011  | 2012  | 2013  | 2014  | 2015  |                                                           |                                                                                                                    |
| Rodrigues<br>Alves         | 2.517         | 4.352  | 3.367  | 3.384  | 3.513  | 4.768  | 4.374  | 3.754                                | 9.77                                          | 12.16 | 15.33 | 12.38 | 10.44 | 15.50 | 16.45 | Local<br>Center (5)                                       | Cruzeiro do<br>Sul                                                                                                 |
| Total                      |               |        |        |        |        |        |        |                                      | 88.07                                         | 89.05 | 95.21 | 90.19 | 90.64 | 91.81 | 92.40 |                                                           |                                                                                                                    |
| AMAPÁ                      | 12.448        | 12.260 | 16.926 | 12.893 | 13.326 | 12.709 | 12.968 | 13.361                               |                                               |       |       |       |       |       |       |                                                           |                                                                                                                    |
| Macapá                     | 2.316         | 1.823  | 2.886  | 2.653  | 3.500  | 1.725  | 2.316  | 2.460                                | 18.61                                         | 14.87 | 17.05 | 20.58 | 26.26 | 13.57 | 17.86 | Regional<br>Capital C<br>(2c)                             | Manaus,<br>Oiapoque,<br>Santana,<br>Calçoene,<br>Porto Grande,<br>Mazagão,<br>Serra do<br>Navio, Portel,<br>Anajás |
| Oiapoque                   | 3.387         | 3.963  | 4.240  | 2.363  | 1.242  | 654    | 1.059  | 2.415                                | 27.21                                         | 32.32 | 25.05 | 18.33 | 9.32  | 5.15  | 8.17  | Local<br>Center (5)                                       | Macapá                                                                                                             |
| Santana                    | 1.772         | 1.422  | 2.247  | 1.111  | 1.436  | 2.469  | 1.713  | 1.739                                | 14.24                                         | 11.60 | 13.28 | 8.62  | 10.78 | 19.43 | 13.21 | Local<br>Center (5)                                       | Macapá                                                                                                             |



| States /<br>Municipalities | Malaria cases |        |        |        |       |       |       |                                | Share of the Municipalities in the States (%) |       |       |       |       |       |       | Managerial centers of the territory <sup>1</sup> | Municipalities of geopolitical and social influence                                                            |
|----------------------------|---------------|--------|--------|--------|-------|-------|-------|--------------------------------|-----------------------------------------------|-------|-------|-------|-------|-------|-------|--------------------------------------------------|----------------------------------------------------------------------------------------------------------------|
|                            | 2009          | 2010   | 2011   | 2012   | 2013  | 2014  | 2015  | Annual average (Malaria cases) | 2009                                          | 2010  | 2011  | 2012  | 2013  | 2014  | 2015  |                                                  |                                                                                                                |
| Manaus                     | 19.372        | 17.547 | 16.147 | 11.610 | 7.016 | 7.261 | 9.623 | 12.654                         | 19.77                                         | 24.49 | 27.97 | 14.41 | 9.38  | 11.05 | 13.15 | Metropolis (1c)                                  | Manicoré, Tabatinga, Borba, Coari, Eirunepé, Barcelos, Humaitá, Lábrea, Porto Velho, Cruzeiro do Sul, Santarém |
| Eirunepé                   | 1.973         | 3.725  | 3.622  | 9.042  | 8.485 | 5.284 | 6.239 | 5.481                          | 2.01                                          | 5.20  | 6.28  | 11.22 | 11.34 | 8.04  | 8.53  | Center of Zone B (4b)                            | Manaus, Tefé, Coari                                                                                            |
| São Gabriel da Cachoeira   | 3.658         | 9.535  | 5.098  | 3.904  | 5.517 | 4.531 | 5.069 | 5.330                          | 3.73                                          | 13.31 | 8.83  | 4.84  | 7.37  | 6.90  | 6.93  | Local Center (5)                                 | Manaus, Barcelos, Tabatinga                                                                                    |
| Lábrea                     | 1.891         | 1.703  | 1.797  | 3.958  | 4.625 | 7.400 | 5.147 | 3.789                          | 1.93                                          | 2.38  | 3.11  | 4.91  | 6.18  | 11.27 | 7.03  | Center of Zone B (4b)                            | Manaus, Porto Velho, Humaitá                                                                                   |
| Ipixuna                    | 4.487         | 515    | 672    | 4.011  | 5.362 | 2.884 | 6.702 | 3.519                          | 4.58                                          | 0.72  | 1.16  | 4.98  | 7.17  | 4.39  | 9.16  | Local Center (5)                                 | Cruzeiro do Sul                                                                                                |

| States /<br>Municipalities | Malaria cases |       |       |       |       |       |       |                                | Share of the Municipalities in the States (%) |      |      |      |      |      |      | Managerial centers of the territory <sup>1</sup> | Municipalities of geopolitical and social influence                         |
|----------------------------|---------------|-------|-------|-------|-------|-------|-------|--------------------------------|-----------------------------------------------|------|------|------|------|------|------|--------------------------------------------------|-----------------------------------------------------------------------------|
|                            | 2009          | 2010  | 2011  | 2012  | 2013  | 2014  | 2015  | Annual average (Malaria cases) | 2009                                          | 2010 | 2011 | 2012 | 2013 | 2014 | 2015 |                                                  |                                                                             |
| Atalaia do Norte           | 3.896         | 3.010 | 2.467 | 5.055 | 3.536 | 2.870 | 2.855 | 3.384                          | 3.98                                          | 4.20 | 4.27 | 6.27 | 4.73 | 4.37 | 3.90 | Local Center (5)                                 | Tabatinga                                                                   |
| Coari                      | 6.221         | 3.270 | 2.398 | 2.936 | 2.551 | 2.191 | 2.145 | 3.102                          | 6.35                                          | 4.56 | 4.15 | 3.64 | 3.41 | 3.34 | 2.93 | Local Center (5)                                 | Manaus, Tefé, Eirunepé                                                      |
| Barcelos                   | 3.100         | 3.227 | 2.138 | 2.376 | 2.505 | 3.876 | 4.211 | 3.062                          | 3.16                                          | 4.50 | 3.70 | 2.95 | 3.35 | 5.90 | 5.75 | Local Center (5)                                 | Manaus, São Gabriel da Cachoeira                                            |
| Tefe                       | 5.473         | 2.194 | 2.259 | 3.124 | 2.898 | 2.704 | 2.736 | 3.055                          | 5.58                                          | 3.06 | 3.91 | 3.88 | 3.87 | 4.12 | 3.74 | Center of sub-region B (3b)                      | Manaus, Tabatinga, Coari, São Paulo de Olivença, Eirunepé, Alvarães, Uarini |

| States /<br>Municipalities | Malaria cases |       |       |       |       |       |       |       | Annual<br>average<br>(Malaria cases) | Share of the Municipalities in the States (%) |      |      |      |      |      | Managerial<br>centers of<br>the<br>territory <sup>1</sup> | Municipalities<br>of<br>geopolitical<br>and social<br>influence                                                                                           |
|----------------------------|---------------|-------|-------|-------|-------|-------|-------|-------|--------------------------------------|-----------------------------------------------|------|------|------|------|------|-----------------------------------------------------------|-----------------------------------------------------------------------------------------------------------------------------------------------------------|
|                            | 2009          | 2010  | 2011  | 2012  | 2013  | 2014  | 2015  | 2009  |                                      | 2010                                          | 2011 | 2012 | 2013 | 2014 | 2015 |                                                           |                                                                                                                                                           |
| Tabatinga                  | 4.258         | 2.078 | 1.291 | 3.947 | 3.072 | 1.580 | 1.877 | 2.586 | 4.34                                 | 2.90                                          | 2.24 | 4.90 | 4.11 | 2.41 | 2.57 | Center of<br>Zone A (4a)                                  | Manaus,<br>Atalaia do<br>Norte,<br>Benjamin<br>Constant,<br>Santo Antônio<br>do Itá, São<br>Paulo de<br>Oliveira, São<br>Gabriel da<br>Cachoeira,<br>Tefé |
| São Paulo de<br>Oliveira   | 2.441         | 865   | 680   | 4.174 | 4.186 | 1.482 | 2.775 | 2.372 | 2.49                                 | 1.21                                          | 1.18 | 5.18 | 5.59 | 2.26 | 3.79 | Local<br>Center (5)                                       | Manaus, Tefé,<br>Tabatinga                                                                                                                                |
| Alvarães                   | 2.787         | 938   | 575   | 1.831 | 2.498 | 1.269 | 1.663 | 1.652 | 2.84                                 | 1.31                                          | 1.00 | 2.27 | 3.34 | 1.93 | 2.27 | Local<br>Center (5)                                       | Tefé                                                                                                                                                      |
| Tapauá                     | 2.959         | 1.661 | 1.119 | 1.412 | 1.015 | 1.981 | 1.361 | 1.644 | 3.02                                 | 2.32                                          | 1.94 | 1.75 | 1.36 | 3.02 | 1.86 | Local<br>Center (5)                                       | Manaus                                                                                                                                                    |
| Benjamin<br>Constant       | 1.981         | 957   | 507   | 2.873 | 2.468 | 715   | 1.460 | 1.566 | 2.02                                 | 1.34                                          | 0.88 | 3.57 | 3.30 | 1.09 | 2.00 | Local<br>Center (5)                                       | Manaus,<br>Tabatinga                                                                                                                                      |

| States /<br>Municipalities | Malaria cases |       |       |       |       |       |       |                                | Share of the Municipalities in the States (%) |      |      |      |      |      |      | Managerial centers of the territory <sup>1</sup> | Municipalities of geopolitical and social influence |
|----------------------------|---------------|-------|-------|-------|-------|-------|-------|--------------------------------|-----------------------------------------------|------|------|------|------|------|------|--------------------------------------------------|-----------------------------------------------------|
|                            | 2009          | 2010  | 2011  | 2012  | 2013  | 2014  | 2015  | Annual average (Malaria cases) | 2009                                          | 2010 | 2011 | 2012 | 2013 | 2014 | 2015 |                                                  |                                                     |
| Guajará                    | 1.707         | 1.020 | 874   | 1.599 | 2.345 | 1.691 | 1.545 | 1.540                          | 1.74                                          | 1.42 | 1.51 | 1.98 | 3.13 | 2.57 | 2.11 | Local Center (5)                                 | Cruzeiro do Sul                                     |
| Santo Antônio do Içá       | 1.673         | 403   | 290   | 1.532 | 1.294 | 2.322 | 2.372 | 1.412                          | 1.71                                          | 0.56 | 0.50 | 1.90 | 1.73 | 3.54 | 3.24 | Local Center (5)                                 | Manaus, Tabatinga                                   |
| Uarini                     | 1.536         | 1.175 | 685   | 884   | 1.439 | 1.298 | 1.787 | 1.258                          | 1.57                                          | 1.64 | 1.19 | 1.10 | 1.92 | 1.98 | 2.44 | Local Center (5)                                 | Manaus, Tefé                                        |
| Borba                      | 3.210         | 1.753 | 2.429 | 667   | 112   | 44    | 9     | 1.175                          | 3.28                                          | 2.45 | 4.21 | 0.83 | 0.15 | 0.07 | 0.01 | Local Center (5)                                 | Manaus, Manicoré, Itacoatiara                       |
| Humaitá                    | 1.204         | 1.181 | 1.834 | 585   | 891   | 1.419 | 556   | 1.096                          | 1.23                                          | 1.65 | 3.18 | 0.73 | 1.19 | 2.16 | 0.76 | Local Center (5)                                 | Manaus, Lábrea, Porto Velho                         |
| Manicoré                   | 1.628         | 1.814 | 1.221 | 404   | 253   | 652   | 315   | 898                            | 1.66                                          | 2.53 | 2.12 | 0.50 | 0.34 | 0.99 | 0.43 | Local Center (5)                                 | Manaus, Borba, Porto Velho                          |
| Pauini                     | 1.188         | 336   | 181   | 676   | 1.076 | 1.518 | 923   | 843                            | 1.21                                          | 0.47 | 0.31 | 0.84 | 1.44 | 2.31 | 1.26 | Local Center (5)                                 | Manaus, Lábrea                                      |
| Itacoatiara                | 2.395         | 1.022 | 271   | 227   | 121   | 118   | 22    | 597                            | 2.44                                          | 1.43 | 0.47 | 0.28 | 0.16 | 0.18 | 0.03 | Center of Zone A (4a)                            | Manaus, Borba, Silves                               |

| States /<br>Municipalities | Malaria cases |         |         |        |        |        |       |                                | Share of the Municipalities in the States (%) |       |       |       |       |       |       | Managerial centers of the territory <sup>1</sup> | Municipalities of geopolitical and social influence |
|----------------------------|---------------|---------|---------|--------|--------|--------|-------|--------------------------------|-----------------------------------------------|-------|-------|-------|-------|-------|-------|--------------------------------------------------|-----------------------------------------------------|
|                            | 2009          | 2010    | 2011    | 2012   | 2013   | 2014   | 2015  | Annual average (Malaria cases) | 2009                                          | 2010  | 2011  | 2012  | 2013  | 2014  | 2015  |                                                  |                                                     |
|                            |               |         |         |        |        |        |       |                                | 80.65                                         | 83.64 | 84.12 | 82.93 | 84.55 | 83.87 | 83.90 |                                                  |                                                     |
| PARÁ                       | 99.437        | 132.982 | 113.874 | 77.737 | 24.037 | 10.593 | 8.800 | 66.780                         |                                               |       |       |       |       |       |       |                                                  |                                                     |
| Anajás                     | 26.073        | 22.646  | 17.446  | 18.824 | 3.004  | 1.751  | 2.476 | 13.174                         | 26.22                                         | 17.03 | 15.32 | 24.21 | 12.50 | 16.53 | 28.14 | Local Center (5)                                 | Macapá, Breves                                      |
| Itaituba                   | 6.193         | 9.933   | 9.862   | 11.523 | 8.970  | 3.774  | 1.816 | 7.439                          | 6.23                                          | 7.47  | 8.66  | 14.82 | 37.32 | 35.63 | 20.64 | Center of sub-region B (3b)                      | Jacareacanga, Novo Progresso                        |
| Oeiras do Para             | 63            | 14.531  | 12.764  | 5.666  | 91     | 4      | 1     | 4.731                          | 0.06                                          | 10.93 | 11.21 | 7.29  | 0.38  | 0.04  | 0.01  | Local Center (5)                                 | Cametá                                              |
| Jacareacanga               | 5.701         | 7.552   | 5.168   | 4.839  | 2.516  | 947    | 731   | 3.922                          | 5.73                                          | 5.68  | 4.54  | 6.22  | 10.47 | 8.94  | 8.31  | Local Center (5)                                 | Itaituba                                            |
| Cametá                     | 25            | 3.445   | 13.710  | 2.449  | 194    | 10     | 1     | 2.833                          | 0.03                                          | 2.59  | 12.04 | 3.15  | 0.81  | 0.09  | 0.01  | Center of sub-region B (3b)                      | Oeiras do Pará                                      |
| Breves                     | 2.546         | 2.546   | 6.600   | 3.707  | 2.539  | 832    | 571   | 2.763                          | 2.56                                          | 1.91  | 5.80  | 4.77  | 10.56 | 7.85  | 6.49  | Center of sub-region B (3b)                      | Bagre, Currálinho, Anajás, Portel                   |



| States /<br>Municipalities | Malaria cases |       |       |       |       |      |      |                                | Share of the Municipalities in the States (%) |      |      |      |      |      |      | Managerial centers of the territory <sup>1</sup> | Municipalities of geopolitical and social influence  |
|----------------------------|---------------|-------|-------|-------|-------|------|------|--------------------------------|-----------------------------------------------|------|------|------|------|------|------|--------------------------------------------------|------------------------------------------------------|
|                            | 2009          | 2010  | 2011  | 2012  | 2013  | 2014 | 2015 | Annual average (Malaria cases) | 2009                                          | 2010 | 2011 | 2012 | 2013 | 2014 | 2015 |                                                  |                                                      |
| Curralinho                 | 1.800         | 7.628 | 4.383 | 1.714 | 130   | 35   | 25   | 2.245                          | 1.81                                          | 5.74 | 3.85 | 2.20 | 0.54 | 0.33 | 0.28 | Local Center (5)                                 | Breves                                               |
| Novo Progresso             | 3.804         | 3.553 | 2.328 | 2.531 | 1.635 | 696  | 301  | 2.121                          | 3.83                                          | 2.67 | 2.04 | 3.26 | 6.80 | 6.57 | 3.42 | Local Center (5)                                 | Itaituba                                             |
| Goianésia do Pará          | 4.111         | 5.749 | 3.017 | 1.197 | 206   | 17   | 2    | 2.043                          | 4.13                                          | 4.32 | 2.65 | 1.54 | 0.86 | 0.16 | 0.02 | Local Center (5)                                 | Marabá, Tucuruí                                      |
| Pacajá                     | 4.409         | 4.004 | 2.630 | 1.348 | 460   | 321  | 177  | 1.907                          | 4.43                                          | 3.01 | 2.31 | 1.73 | 1.91 | 3.03 | 2.01 | Local Center (5)                                 | Altamira, Tucuruí                                    |
| Bagre                      | 64            | 5.408 | 3.794 | 1.930 | 32    | 7    | 1    | 1.605                          | 0.06                                          | 4.07 | 3.33 | 2.48 | 0.13 | 0.07 | 0.01 | Local Center (5)                                 | Breves                                               |
| Afuá                       | 2.507         | 1.919 | 1.076 | 2.200 | 652   | 550  | 681  | 1.369                          | 2.52                                          | 1.44 | 0.94 | 2.83 | 2.71 | 5.19 | 7.74 | Local Center (5)                                 | Macapá                                               |
| Tucuruí                    | 1.892         | 3.412 | 1.712 | 1.549 | 406   | 103  | 162  | 1.319                          | 1.90                                          | 2.57 | 1.50 | 1.99 | 1.69 | 0.97 | 1.84 | Center of sub-region B (3b)                      | Pacajá, Altamira, Goianésia do Pará, Jacundá, Marabá |
| Anapu                      | 893           | 2.216 | 3.970 | 1.583 | 248   | 154  | 24   | 1.298                          | 0.90                                          | 1.67 | 3.49 | 2.04 | 1.03 | 1.45 | 0.27 | Local Center (5)                                 | Pacajá                                               |

| States /<br>Municipalities | Malaria cases |       |       |       |      |      |      |                                | Share of the Municipalities in the States (%) |      |      |      |      |      |      | Managerial centers of the territory <sup>1</sup> | Municipalities of geopolitical and social influence |
|----------------------------|---------------|-------|-------|-------|------|------|------|--------------------------------|-----------------------------------------------|------|------|------|------|------|------|--------------------------------------------------|-----------------------------------------------------|
|                            | 2009          | 2010  | 2011  | 2012  | 2013 | 2014 | 2015 | Annual average (Malaria cases) | 2009                                          | 2010 | 2011 | 2012 | 2013 | 2014 | 2015 |                                                  |                                                     |
| Altamira                   | 1.863         | 2.216 | 2.050 | 2.089 | 309  | 134  | 32   | 1.242                          | 1.87                                          | 1.67 | 1.80 | 2.69 | 1.29 | 1.26 | 0.36 | Center of sub-region B (3b)                      | Manaus, Oriximiná, Anapu, Marabá, Pacajá            |
| Paragominas                | 4.416         | 2.501 | 592   | 703   | 56   | 1    | 6    | 1.182                          | 4.44                                          | 1.88 | 0.52 | 0.90 | 0.23 | 0.01 | 0.07 | Center of sub-region B (3b)                      | Ipixuna do Pará                                     |
| Ipixuna do Para            | 4.045         | 2.316 | 962   | 829   | 26   | 0    | 1    | 1.168                          | 4.07                                          | 1.74 | 0.84 | 1.07 | 0.11 | 0.00 | 0.01 | Local Center (5)                                 | Paragominas                                         |
| Portel                     | 2.599         | 1.190 | 1.868 | 1.293 | 753  | 235  | 142  | 1.154                          | 2.61                                          | 0.89 | 1.64 | 1.66 | 3.13 | 2.22 | 1.61 | Local Center (5)                                 | Macapá, Breves                                      |
| Jacundá                    | 1.120         | 1.990 | 550   | 409   | 50   | 6    | 1    | 589                            | 1.13                                          | 1.50 | 0.48 | 0.53 | 0.21 | 0.06 | 0.01 | Local Center (5)                                 | Marabá, Tucuruí                                     |
| Marabá                     | 1.208         | 1.352 | 731   | 256   | 33   | 32   | 16   | 518                            | 1.21                                          | 1.02 | 0.64 | 0.33 | 0.14 | 0.30 | 0.18 | Regional Capital C (2c)                          | Altamira, Goianésia do Pará, Tucuruí, Jacundá       |
| Cachoeira do Piria         | 2.418         | 572   | 467   | 32    | 0    | 0    | 0    | 498                            | 2.43                                          | 0.43 | 0.41 | 0.04 | 0.00 | 0.00 | 0.00 | Local Center (5)                                 | -                                                   |

| States /<br>Municipalities | Malaria cases |               |               |               |               |              |              |                                | Share of the Municipalities in the States (%) |              |              |              |              |              |              | Managerial centers of the territory <sup>1</sup> | Municipalities of geopolitical and social influence                                                               |
|----------------------------|---------------|---------------|---------------|---------------|---------------|--------------|--------------|--------------------------------|-----------------------------------------------|--------------|--------------|--------------|--------------|--------------|--------------|--------------------------------------------------|-------------------------------------------------------------------------------------------------------------------|
|                            | 2009          | 2010          | 2011          | 2012          | 2013          | 2014         | 2015         | Annual average (Malaria cases) | 2009                                          | 2010         | 2011         | 2012         | 2013         | 2014         | 2015         |                                                  |                                                                                                                   |
| Oriximiná                  | 2.661         | 493           | 70            | 13            | 37            | 29           | 13           | 474                            | 2.68                                          | 0.37         | 0.06         | 0.02         | 0.15         | 0.27         | 0.15         | Local Center (5)                                 | Altamira                                                                                                          |
| Nova Esperança do Piriá    | 1.360         | 949           | 139           | 7             | 2             | 0            | 0            | 351                            | 1.37                                          | 0.71         | 0.12         | 0.01         | 0.01         | 0.00         | 0.00         | Local Center (5)                                 | -                                                                                                                 |
| Total                      |               |               |               |               |               |              |              |                                | <b>82.23</b>                                  | <b>81.30</b> | <b>84.21</b> | <b>85.79</b> | <b>92.98</b> | <b>90.98</b> | <b>81.59</b> |                                                  |                                                                                                                   |
| <b>RONDÔNIA</b>            | <b>38.071</b> | <b>40.622</b> | <b>27.453</b> | <b>21.624</b> | <b>12.892</b> | <b>9.118</b> | <b>6.381</b> | <b>22.309</b>                  |                                               |              |              |              |              |              |              |                                                  |                                                                                                                   |
| Porto Velho                | 18.786        | 21.565        | 15.244        | 14.265        | 8.164         | 5.890        | 3.121        | 12.434                         | 49.34                                         | 53.09        | 55.53        | 65.97        | 63.33        | 64.60        | 48.91        | Regional Capital B (2b)                          | Manaus, Cruzeiro do Sul, Lábrea, Humaitá, Manicoré, Candeias do Jamari, Cujubim, Ariquemes, Alto Paraíso, Buritis |
| Candeias do Jamari         | 2.918         | 3.136         | 3.210         | 2.161         | 1.277         | 1.186        | 987          | 2.125                          | 7.66                                          | 7.72         | 11.69        | 9.99         | 9.91         | 13.01        | 15.47        | Local Center (5)                                 | Porto Velho                                                                                                       |



| States /<br>Municipalities | Malaria cases |       |       |      |      |      |      |       | Annual<br>average<br>(Malaria cases) | Share of the Municipalities in the States (%) |      |      |      |      |      | Managerial centers of the territory <sup>1</sup> | Municipalities of geopolitical and social influence |
|----------------------------|---------------|-------|-------|------|------|------|------|-------|--------------------------------------|-----------------------------------------------|------|------|------|------|------|--------------------------------------------------|-----------------------------------------------------|
|                            | 2009          | 2010  | 2011  | 2012 | 2013 | 2014 | 2015 | 2009  |                                      | 2010                                          | 2011 | 2012 | 2013 | 2014 | 2015 |                                                  |                                                     |
| MATO GROSSO                | 2.412         | 1.585 | 1.133 | 692  | 713  | 673  | 837  | 1.149 |                                      |                                               |      |      |      |      |      |                                                  |                                                     |
| MARANHÃO                   | 3.714         | 2.028 | 2.157 | 941  | 529  | 588  | 162  | 1.446 |                                      |                                               |      |      |      |      |      |                                                  |                                                     |
| TOCANTINS                  | 12            | 9     | 6     | 1    | 6    | 1    | 0    | 5     |                                      |                                               |      |      |      |      |      |                                                  |                                                     |

**Note:** (1c) Metropolis with an extensive area of direct influence with a population of over 2 million inhabitants; (2b) regional areas of influence referred to as destination for a set of activities by a large number of municipalities, with a median of 435,000 inhabitants and 406 relationships; (2c) with medians of 250,000 inhabitants and 162 relationships; (3a) their relationships are generally only with the three national metropolis, with medians of 95 thousand inhabitants and 112 relationships; (3b) with medians of 71,000 inhabitants and 71 relationships; (4a), with activities restricted to their immediate area, perform elementary management functions with medians of 45,000 inhabitants and 49 relationships; (4b) with medians of 23,000 inhabitants and 16 relationships; (5) cities whose centrality and performance do not exceed the boundaries of their municipality, serving only their inhabitants, have a population of less than 10,000 inhabitants.

<sup>1</sup> Management centers of the territory: size of the region of influence, in terms of the resident population of the municipalities for which the center represents the focus and the relationship, indicated by the frequency of mentions as the destination for the municipalities.
